# Supplementary material
Source: PubMed Central journal article supplement (PMC6868896)
Supplement: ao9b02782_si_001.pdf [file ao9b02782_si_001.pdf]

## Supplementary information (SI)

---

# The Hydroxyl Radical Scavenging of Indole-3-carbinol: A Mechanistic and Kinetic Study

Quan V. Vo,<sup>\*,†,‡</sup> Mai Van Bay,<sup>§</sup> Pham Cam Nam,<sup>||</sup> and Adam Mechler<sup>⊥</sup>

<sup>†</sup>Department for Management of Science and Technology Development, Ton Duc Thang University, Ho Chi Minh City 758307, Vietnam

<sup>‡</sup>Faculty of Applied Sciences, Ton Duc Thang University, Ho Chi Minh City 758307, Vietnam

<sup>§</sup>Department of Chemistry, The University of Da Nang–University of Science and Education, Da Nang 550000, Vietnam.

<sup>||</sup> Department of Chemistry, The University of Da Nang–University of Science and Technology, Da Nang 550000, Vietnam

<sup>⊥</sup>Department of Chemistry and Physics, La Trobe University, Melbourne Victoria 3086, Australia

\*Corresponding author: [vovanquan@tdtu.edu.vn](mailto:vovanquan@tdtu.edu.vn)

### List of supporting information:

#### Table of Contents

Table S1: Cartesian coordinates and molecular enthalpies of TSs of in water and pentyl ethanoate.....S2

**Table S1: Cartesian coordinates and molecular enthalpies of TSs in water and pentyl ethanoate.**

| Water                                                    |             |             |             | Pentyl ethanoate                                         |             |             |             |
|----------------------------------------------------------|-------------|-------------|-------------|----------------------------------------------------------|-------------|-------------|-------------|
| <b>Name: TS-O11-H-OH-HAT</b>                             |             |             |             |                                                          |             |             |             |
| Cartesian Coordinates                                    |             |             |             |                                                          |             |             |             |
| C                                                        | 2.69524400  | 0.04216100  | 0.28121600  | C                                                        | 2.58922000  | 0.63924400  | 0.37978500  |
| C                                                        | 2.70530600  | -1.32947900 | -0.01084000 | C                                                        | 3.02400300  | -0.67607600 | 0.33779500  |
| C                                                        | 1.54448100  | -2.00672100 | -0.40386200 | C                                                        | 2.15683600  | -1.72513700 | -0.03400800 |
| C                                                        | 0.32622600  | -1.34317500 | -0.51675600 | C                                                        | 0.83524700  | -1.47888800 | -0.36889000 |
| C                                                        | 0.28856100  | 0.03265700  | -0.22909800 | C                                                        | 0.36762300  | -0.15391900 | -0.33895300 |
| C                                                        | 1.48288000  | 0.68437100  | 0.16260700  | C                                                        | 1.25479900  | 0.88302900  | 0.03637800  |
| H                                                        | 3.59252200  | 0.56560800  | 0.58420800  | H                                                        | 3.25386700  | 1.44542500  | 0.66621200  |
| H                                                        | 3.63664800  | -1.87497900 | 0.07053900  | H                                                        | 4.05078300  | -0.90449600 | 0.59729600  |
| H                                                        | 1.59698800  | -3.06574800 | -0.61992200 | H                                                        | 2.53395300  | -2.74044400 | -0.05152000 |
| H                                                        | -0.56979700 | -1.86681700 | -0.81535400 | H                                                        | 0.17000000  | -2.28942900 | -0.64076400 |
| C                                                        | -0.11646600 | 2.24122900  | 0.16674400  | C                                                        | -0.73728200 | 1.81219100  | -0.40078800 |
| H                                                        | -0.56790000 | 3.21446600  | 0.28691300  | H                                                        | -1.45347700 | 2.61403900  | -0.49852800 |
| N                                                        | 1.17038200  | 2.03444500  | 0.38987200  | N                                                        | 0.55263900  | 2.06544400  | -0.01403600 |
| H                                                        | 1.83003600  | 2.74224200  | 0.69035800  | H                                                        | 0.92467700  | 2.97590200  | 0.20202000  |
| C                                                        | -0.74308900 | 1.01664300  | -0.23099700 | C                                                        | -0.90442600 | 0.46570200  | -0.61638700 |
| H                                                        | -2.69347800 | -1.06075100 | 0.43551200  | H                                                        | -2.84246000 | -0.90962400 | 0.76090700  |
| C                                                        | -2.19081100 | 0.90946700  | -0.55130800 | C                                                        | -2.16233500 | -0.20881300 | -1.05345100 |
| H                                                        | -2.71801500 | 1.38077200  | 0.30383400  | H                                                        | -2.97171800 | 0.51976200  | -1.15349300 |
| H                                                        | -2.36605400 | 1.61658100  | -1.38577900 | H                                                        | -2.02069400 | -0.69154300 | -2.02840500 |
| O                                                        | -2.65222200 | -0.36326600 | -0.83086400 | O                                                        | -2.54373000 | -1.28262600 | -0.20821300 |
| O                                                        | -2.72223800 | -1.50363700 | 1.38953500  | O                                                        | -2.73383500 | -0.21505900 | 1.81040300  |
| H                                                        | -2.89193800 | -2.44017500 | 1.24497800  | H                                                        | -1.83500300 | 0.15978400  | 1.77812400  |
| Frequency and Energy                                     |             |             |             |                                                          |             |             |             |
| Zero-point correction= 0.173623 (Hartree/Particle)       |             |             |             | Zero-point correction= 0.170691 (Hartree/Particle)       |             |             |             |
| Thermal correction to Energy= 0.184379                   |             |             |             | Thermal correction to Energy= 0.181492                   |             |             |             |
| Thermal correction to Enthalpy= 0.185323                 |             |             |             | Thermal correction to Enthalpy= 0.182436                 |             |             |             |
| Thermal correction to Gibbs Free Energy= 0.135319        |             |             |             | Thermal correction to Gibbs Free Energy= 0.133037        |             |             |             |
| Sum of electronic and zero-point Energies= -553.930108   |             |             |             | Sum of electronic and zero-point Energies= -553.897646   |             |             |             |
| Sum of electronic and thermal Energies= -553.919352      |             |             |             | Sum of electronic and thermal Energies= -553.886844      |             |             |             |
| Sum of electronic and thermal Enthalpies= -553.918407    |             |             |             | Sum of electronic and thermal Enthalpies= -553.885900    |             |             |             |
| Sum of electronic and thermal Free Energies= -553.968411 |             |             |             | Sum of electronic and thermal Free Energies= -553.935299 |             |             |             |
| <b>Name: TS-N1-H-OH-HAT</b>                              |             |             |             |                                                          |             |             |             |
| Cartesian Coordinates                                    |             |             |             |                                                          |             |             |             |
| C                                                        | -2.26089700 | 0.25385000  | -0.23086300 | C                                                        | -2.24390800 | 0.17420400  | -0.17449200 |
| C                                                        | -2.80516100 | -1.00796700 | 0.00789800  | C                                                        | -2.74068900 | -1.11363100 | 0.02362200  |

|                                                          |             |             |             |                                                          |             |             |             |
|----------------------------------------------------------|-------------|-------------|-------------|----------------------------------------------------------|-------------|-------------|-------------|
| C                                                        | -1.98411200 | -2.12856200 | 0.20015600  | C                                                        | -1.87833000 | -2.21053000 | 0.16390400  |
| C                                                        | -0.59377500 | -2.01636300 | 0.17582400  | C                                                        | -0.49303600 | -2.04917200 | 0.13120000  |
| C                                                        | -0.03839700 | -0.75899400 | -0.05226100 | C                                                        | 0.01720600  | -0.76618900 | -0.06075100 |
| C                                                        | -0.87914200 | 0.35663000  | -0.28048000 | C                                                        | -0.86809000 | 0.32186100  | -0.24799500 |
| H                                                        | -2.87942100 | 1.12991000  | -0.34500200 | H                                                        | -2.87512500 | 1.04658500  | -0.22492800 |
| H                                                        | -3.87774100 | -1.12261300 | 0.05130800  | H                                                        | -3.80752600 | -1.26840900 | 0.07936400  |
| H                                                        | -2.43795500 | -3.09167200 | 0.37879200  | H                                                        | -2.29600800 | -3.19545200 | 0.31151800  |
| H                                                        | 0.03503500  | -2.88042000 | 0.33290000  | H                                                        | 0.16445000  | -2.89713600 | 0.25242000  |
| C                                                        | 1.25368900  | 1.09211500  | -0.35593200 | C                                                        | 1.22524400  | 1.15194100  | -0.31033800 |
| H                                                        | 2.06218600  | 1.78782800  | -0.46890500 | H                                                        | 2.01096300  | 1.87362400  | -0.42321500 |
| N                                                        | -0.06848200 | 1.47708000  | -0.53845000 | N                                                        | -0.10538300 | 1.47998400  | -0.47472200 |
| H                                                        | -0.52193400 | 2.51851500  | -0.34184600 | H                                                        | -0.65643000 | 2.50093500  | -0.31616700 |
| C                                                        | 1.32478500  | -0.25505800 | -0.10123500 | C                                                        | 1.35608600  | -0.20450000 | -0.09765500 |
| H                                                        | 3.65535100  | 0.31886800  | 1.02449800  | H                                                        | 3.64236400  | 0.39025300  | 1.11673700  |
| C                                                        | 2.58444600  | -1.03937800 | 0.03226500  | C                                                        | 2.65874500  | -0.92408600 | -0.01206100 |
| H                                                        | 2.50920900  | -1.72199600 | 0.88318000  | H                                                        | 2.61320300  | -1.68816100 | 0.77107700  |
| H                                                        | 2.75856000  | -1.63537900 | -0.86446600 | H                                                        | 2.88187400  | -1.42249900 | -0.95622100 |
| O                                                        | 3.73308800  | -0.14485600 | 0.15064200  | O                                                        | 3.74833700  | 0.02354700  | 0.20000900  |
| O                                                        | -1.20701300 | 3.16314800  | 0.52442500  | O                                                        | -1.49768700 | 3.08838700  | 0.40943000  |
| H                                                        | -0.64113300 | 3.23342500  | 1.34592000  | H                                                        | -1.14464500 | 3.12550400  | 1.34435900  |
| Frequency and Energy                                     |             |             |             |                                                          |             |             |             |
| Zero-point correction= 0.175957 (Hartree/Particle)       |             |             |             | Zero-point correction= 0.171113 (Hartree/Particle)       |             |             |             |
| Thermal correction to Energy= 0.187477                   |             |             |             | Thermal correction to Energy= 0.182574                   |             |             |             |
| Thermal correction to Enthalpy= 0.188421                 |             |             |             | Thermal correction to Enthalpy= 0.183518                 |             |             |             |
| Thermal correction to Gibbs Free Energy= 0.136005        |             |             |             | Thermal correction to Gibbs Free Energy= 0.132626        |             |             |             |
| Sum of electronic and zero-point Energies= -553.908110   |             |             |             | Sum of electronic and zero-point Energies= -553.895816   |             |             |             |
| Sum of electronic and thermal Energies= -553.896591      |             |             |             | Sum of electronic and thermal Energies= -553.884354      |             |             |             |
| Sum of electronic and thermal Enthalpies= -553.895646    |             |             |             | Sum of electronic and thermal Enthalpies= -553.883410    |             |             |             |
| Sum of electronic and thermal Free Energies= -553.948062 |             |             |             | Sum of electronic and thermal Free Energies= -553.934303 |             |             |             |
| <b>Name: TS-C5-H-OH-HAT</b>                              |             |             |             |                                                          |             |             |             |
| Cartesian Coordinates                                    |             |             |             |                                                          |             |             |             |
| C                                                        | -2.65138000 | -0.23356900 | 0.15520700  | C                                                        | -2.53518300 | -0.68530800 | 0.13667900  |
| C                                                        | -2.70940300 | 1.14988300  | 0.09666700  | C                                                        | -2.82088700 | 0.66386100  | 0.27013400  |
| C                                                        | -1.54120000 | 1.92980400  | -0.06420100 | C                                                        | -1.79941600 | 1.63919400  | 0.22357800  |
| C                                                        | -0.32077500 | 1.30147700  | -0.18764500 | C                                                        | -0.48929400 | 1.24222000  | 0.06737400  |
| C                                                        | -0.20139900 | -0.09069500 | -0.13670500 | C                                                        | -0.14173500 | -0.10443900 | -0.07238600 |
| C                                                        | -1.39474100 | -0.83856400 | 0.03914300  | C                                                        | -1.19554100 | -1.05394500 | -0.03362800 |
| H                                                        | -3.54565300 | -0.82936700 | 0.29072100  | H                                                        | -3.32192200 | -1.42982700 | 0.15999000  |
| H                                                        | -3.66639300 | 1.64932800  | 0.18452700  | H                                                        | -3.84743000 | 0.98219600  | 0.40535400  |
| H                                                        | -1.61155700 | 3.01004200  | -0.08979600 | H                                                        | -2.04938700 | 2.68906500  | 0.31617600  |

|                                                          |             |             |             |                                                          |             |             |             |
|----------------------------------------------------------|-------------|-------------|-------------|----------------------------------------------------------|-------------|-------------|-------------|
| H                                                        | 0.65731300  | 1.97356400  | -0.31259900 | H                                                        | 0.37137600  | 2.08419000  | 0.03221800  |
| C                                                        | 0.31486200  | -2.27838800 | -0.07870800 | C                                                        | 0.72991700  | -2.15894100 | -0.33355400 |
| H                                                        | 0.78854500  | -3.24799700 | -0.08437900 | H                                                        | 1.35742200  | -3.02639500 | -0.47376700 |
| N                                                        | -1.04352400 | -2.16640600 | 0.06738500  | N                                                        | -0.62823100 | -2.29428000 | -0.19814800 |
| H                                                        | -1.68282000 | -2.93816000 | 0.17657500  | H                                                        | -1.12871800 | -3.16803900 | -0.21992200 |
| C                                                        | 0.88203300  | -1.03618200 | -0.21491200 | C                                                        | 1.08373600  | -0.83436700 | -0.26383200 |
| H                                                        | 2.68701400  | -0.33832200 | 1.47653500  | H                                                        | 2.75805400  | -0.62391200 | 1.61766000  |
| C                                                        | 2.33079500  | -0.74836700 | -0.42276700 | C                                                        | 2.47310800  | -0.28466400 | -0.28551200 |
| H                                                        | 2.88531800  | -1.68580000 | -0.49423400 | H                                                        | 3.15333300  | -1.02995500 | -0.70935500 |
| H                                                        | 2.49376300  | -0.17692400 | -1.33688600 | H                                                        | 2.52774000  | 0.61762200  | -0.89311200 |
| O                                                        | 2.89205400  | 0.07032200  | 0.62577400  | O                                                        | 2.92259100  | 0.11115000  | 1.01661200  |
| O                                                        | 1.82909000  | 2.56141500  | -0.08552000 | O                                                        | 1.08934600  | 3.05037800  | -0.48536500 |
| H                                                        | 2.27723400  | 1.76219600  | 0.27932500  | H                                                        | 0.65342000  | 3.13112500  | -1.35130900 |
| Frequency and Energy                                     |             |             |             |                                                          |             |             |             |
| Zero-point correction= 0.171542 (Hartree/Particle)       |             |             |             | Zero-point correction= 0.171019 (Hartree/Particle)       |             |             |             |
| Thermal correction to Energy= 0.182059                   |             |             |             | Thermal correction to Energy= 0.182339                   |             |             |             |
| Thermal correction to Enthalpy= 0.183003                 |             |             |             | Thermal correction to Enthalpy= 0.183283                 |             |             |             |
| Thermal correction to Gibbs Free Energy= 0.135045        |             |             |             | Thermal correction to Gibbs Free Energy= 0.133126        |             |             |             |
| Sum of electronic and zero-point Energies= -553.901623   |             |             |             | Sum of electronic and zero-point Energies= -553.890353   |             |             |             |
| Sum of electronic and thermal Energies= -553.891106      |             |             |             | Sum of electronic and thermal Energies= -553.879033      |             |             |             |
| Sum of electronic and thermal Enthalpies= -553.890162    |             |             |             | Sum of electronic and thermal Enthalpies= -553.878089    |             |             |             |
| Sum of electronic and thermal Free Energies= -553.938121 |             |             |             | Sum of electronic and thermal Free Energies= -553.928246 |             |             |             |
| <b>Name: TS-C6-H-OH-HAT</b>                              |             |             |             |                                                          |             |             |             |
| Cartesian Coordinates                                    |             |             |             |                                                          |             |             |             |
| C                                                        | 1.18936800  | -1.98458800 | -0.22165500 | C                                                        | -1.17796400 | 1.99545000  | -0.21323100 |
| C                                                        | 2.26418500  | -1.10724900 | -0.25528600 | C                                                        | -2.25444500 | 1.12110700  | -0.25012100 |
| C                                                        | 2.03702000  | 0.27168800  | -0.12173500 | C                                                        | -2.03092900 | -0.25889600 | -0.12725600 |
| C                                                        | 0.79364300  | 0.83504100  | 0.07217900  | C                                                        | -0.78907900 | -0.82649400 | 0.05949600  |
| C                                                        | -0.30575300 | -0.04287500 | 0.10600800  | C                                                        | 0.31265700  | 0.04766900  | 0.09912800  |
| C                                                        | -0.08577100 | -1.43535000 | -0.04238100 | C                                                        | 0.09616700  | 1.44174700  | -0.03742500 |
| H                                                        | 1.33200700  | -3.05305900 | -0.32852100 | H                                                        | -1.32101800 | 3.06452100  | -0.31556100 |
| H                                                        | 3.27058400  | -1.48289100 | -0.39009500 | H                                                        | -3.26035800 | 1.49915500  | -0.38334400 |
| H                                                        | 2.97062600  | 0.98975400  | -0.18579600 | H                                                        | -2.97937500 | -0.98203500 | -0.19987700 |
| H                                                        | 0.66383200  | 1.90474200  | 0.18720000  | H                                                        | -0.66050700 | -1.89811600 | 0.15529700  |
| C                                                        | -2.28376400 | -1.10754900 | 0.22909900  | C                                                        | 2.29609900  | 1.10310200  | 0.21859800  |
| H                                                        | -3.31942200 | -1.39766200 | 0.32009600  | H                                                        | 3.33389200  | 1.38749700  | 0.30637000  |
| N                                                        | -1.30949000 | -2.05428600 | 0.03838900  | N                                                        | 1.32305900  | 2.05462500  | 0.04264700  |
| H                                                        | -1.46810100 | -3.04767600 | -0.02548400 | H                                                        | 1.48683300  | 3.04597700  | -0.02411200 |
| C                                                        | -1.72282300 | 0.14414200  | 0.28034300  | C                                                        | 1.73043500  | -0.14608000 | 0.26516900  |
| H                                                        | -2.80223100 | 1.75890500  | -1.44547800 | H                                                        | 2.52626100  | -1.79815200 | -1.48452200 |

|                                                          |             |             |             |                                                          |             |             |             |
|----------------------------------------------------------|-------------|-------------|-------------|----------------------------------------------------------|-------------|-------------|-------------|
| C                                                        | -2.44433400 | 1.43764000  | 0.45827500  | C                                                        | 2.44712600  | -1.44483800 | 0.43769800  |
| H                                                        | -3.48157500 | 1.24525300  | 0.74118000  | H                                                        | 3.50485500  | -1.25352000 | 0.64403400  |
| H                                                        | -1.97839300 | 2.04013300  | 1.23804400  | H                                                        | 2.03739900  | -2.00897200 | 1.27679100  |
| O                                                        | -2.40363400 | 2.26062400  | -0.72376900 | O                                                        | 2.30542000  | -2.30737000 | -0.69640100 |
| O                                                        | 4.05764300  | 1.72330400  | 0.15975400  | O                                                        | -4.02551300 | -1.69805200 | 0.18013700  |
| H                                                        | 4.09639200  | 1.48568500  | 1.10316900  | H                                                        | -3.94905000 | -1.59194500 | 1.14416300  |
| Frequency and Energy                                     |             |             |             |                                                          |             |             |             |
| Zero-point correction= 0.170440 (Hartree/Particle)       |             |             |             | Zero-point correction= 0.170777 (Hartree/Particle)       |             |             |             |
| Thermal correction to Energy= 0.181821                   |             |             |             | Thermal correction to Energy= 0.182195                   |             |             |             |
| Thermal correction to Enthalpy= 0.182765                 |             |             |             | Thermal correction to Enthalpy= 0.183139                 |             |             |             |
| Thermal correction to Gibbs Free Energy= 0.131711        |             |             |             | Thermal correction to Gibbs Free Energy= 0.132304        |             |             |             |
| Sum of electronic and zero-point Energies= -553.898650   |             |             |             | Sum of electronic and zero-point Energies= -553.892313   |             |             |             |
| Sum of electronic and thermal Energies= -553.887269      |             |             |             | Sum of electronic and thermal Energies= -553.880895      |             |             |             |
| Sum of electronic and thermal Enthalpies= -553.886325    |             |             |             | Sum of electronic and thermal Enthalpies= -553.879950    |             |             |             |
| Sum of electronic and thermal Free Energies= -553.937379 |             |             |             | Sum of electronic and thermal Free Energies= -553.930786 |             |             |             |
| <b>Name: TS-C7-H-OH-HAT</b>                              |             |             |             |                                                          |             |             |             |
| Cartesian Coordinates                                    |             |             |             |                                                          |             |             |             |
| C                                                        | -1.68629200 | 1.01271400  | -0.18608800 | C                                                        | -1.69328800 | 1.00099200  | -0.20615300 |
| C                                                        | -2.27295600 | -0.23382500 | -0.12004000 | C                                                        | -2.26781200 | -0.25137500 | -0.15193900 |
| C                                                        | -1.57053600 | -1.42993400 | 0.09353800  | C                                                        | -1.55450100 | -1.44095700 | 0.05846300  |
| C                                                        | -0.18926700 | -1.39055400 | 0.22660000  | C                                                        | -0.17461300 | -1.38888500 | 0.19584500  |
| C                                                        | 0.46569700  | -0.14928000 | 0.15483400  | C                                                        | 0.46799600  | -0.14103300 | 0.13657700  |
| C                                                        | -0.29179800 | 1.03106100  | -0.05085100 | C                                                        | -0.29932900 | 1.03270700  | -0.06665800 |
| H                                                        | -2.25999200 | 1.91831700  | -0.33869400 | H                                                        | -2.27952400 | 1.89939200  | -0.35641000 |
| H                                                        | -3.44298500 | -0.29990500 | -0.26511500 | H                                                        | -3.45108800 | -0.32528300 | -0.30361400 |
| H                                                        | -2.10280200 | -2.37116200 | 0.14583100  | H                                                        | -2.07729300 | -2.38832700 | 0.09893000  |
| H                                                        | 0.37348000  | -2.30370400 | 0.38194700  | H                                                        | 0.39998500  | -2.29641300 | 0.33908100  |
| C                                                        | 1.86163500  | 1.61652600  | 0.10111600  | C                                                        | 1.85012100  | 1.63630700  | 0.09646400  |
| H                                                        | 2.69946400  | 2.29694100  | 0.11332600  | H                                                        | 2.68283300  | 2.32328000  | 0.11652200  |
| N                                                        | 0.58486500  | 2.08723800  | -0.07634700 | N                                                        | 0.56951900  | 2.09601300  | -0.08521800 |
| H                                                        | 0.33175200  | 3.05442900  | -0.20410100 | H                                                        | 0.31092500  | 3.06086100  | -0.21185100 |
| C                                                        | 1.84579000  | 0.25283100  | 0.25142600  | C                                                        | 1.84443400  | 0.27229600  | 0.24240800  |
| H                                                        | 3.38780600  | -0.94794100 | -1.45117500 | H                                                        | 3.19625300  | -1.05453600 | -1.44239100 |
| C                                                        | 3.02881400  | -0.63417300 | 0.45230500  | C                                                        | 3.03260300  | -0.60744100 | 0.45575000  |
| H                                                        | 3.91702100  | -0.02792100 | 0.64369900  | H                                                        | 3.92584200  | 0.01107500  | 0.58934600  |
| H                                                        | 2.87592600  | -1.30259800 | 1.29971600  | H                                                        | 2.90880900  | -1.22001500 | 1.35022300  |
| O                                                        | 3.26086100  | -1.50371000 | -0.67252500 | O                                                        | 3.22555200  | -1.54275800 | -0.61186100 |
| O                                                        | -4.78642900 | -0.33946900 | -0.10238000 | O                                                        | -4.74296000 | -0.33928200 | -0.02490200 |
| H                                                        | -4.81570100 | -0.33388700 | 0.87119300  | H                                                        | -4.69778000 | -0.30147900 | 0.94624700  |
| Frequency and Energy                                     |             |             |             |                                                          |             |             |             |

|                                              |                             |                                              |                             |
|----------------------------------------------|-----------------------------|----------------------------------------------|-----------------------------|
| Zero-point correction=                       | 0.170200 (Hartree/Particle) | Zero-point correction=                       | 0.170744 (Hartree/Particle) |
| Thermal correction to Energy=                | 0.181597                    | Thermal correction to Energy=                | 0.182087                    |
| Thermal correction to Enthalpy=              | 0.182541                    | Thermal correction to Enthalpy=              | 0.183031                    |
| Thermal correction to Gibbs Free Energy=     | 0.131328                    | Thermal correction to Gibbs Free Energy=     | 0.132439                    |
| Sum of electronic and zero-point Energies=   | -553.898675                 | Sum of electronic and zero-point Energies=   | -553.892014                 |
| Sum of electronic and thermal Energies=      | -553.887278                 | Sum of electronic and thermal Energies=      | -553.880671                 |
| Sum of electronic and thermal Enthalpies=    | -553.886334                 | Sum of electronic and thermal Enthalpies=    | -553.879727                 |
| Sum of electronic and thermal Free Energies= | -553.937547                 | Sum of electronic and thermal Free Energies= | -553.930319                 |
| <b>Name: TS-C8-H-OH-HAT</b>                  |                             |                                              |                             |
| Cartesian Coordinates                        |                             |                                              |                             |
| C                                            | 1.95169800                  | 0.21449000                                   | -0.14637700                 |
| C                                            | 2.04474500                  | 1.58786500                                   | -0.08100400                 |
| C                                            | 0.87296000                  | 2.36000300                                   | 0.09141700                  |
| C                                            | -0.37108500                 | 1.75979400                                   | 0.21131200                  |
| C                                            | -0.46495400                 | 0.35845600                                   | 0.15991600                  |
| C                                            | 0.71424300                  | -0.41021400                                  | -0.01485500                 |
| H                                            | 2.92199500                  | -0.44964400                                  | -0.32716200                 |
| H                                            | 3.00742800                  | 2.07596400                                   | -0.16884600                 |
| H                                            | 0.95872500                  | 3.43898500                                   | 0.13104400                  |
| H                                            | -1.26160800                 | 2.36301100                                   | 0.34550600                  |
| C                                            | -1.00213300                 | -1.82998900                                  | 0.13947900                  |
| H                                            | -1.48319400                 | -2.79561200                                  | 0.16668900                  |
| N                                            | 0.35782900                  | -1.73403700                                  | -0.02325300                 |
| H                                            | 0.99323100                  | -2.51070000                                  | -0.12024000                 |
| C                                            | -1.55440900                 | -0.57991100                                  | 0.25822600                  |
| H                                            | -3.44060500                 | -0.22388000                                  | -1.47829500                 |
| C                                            | -3.00223900                 | -0.26474500                                  | 0.43386700                  |
| H                                            | -3.55082400                 | -1.17944400                                  | 0.66941700                  |
| H                                            | -3.15104900                 | 0.44682900                                   | 1.24593900                  |
| O                                            | -3.57560900                 | 0.36619500                                   | -0.72680600                 |
| O                                            | 3.98541200                  | -1.24127000                                  | -0.19626800                 |
| H                                            | 4.08972000                  | -1.20115200                                  | 0.77143000                  |
| C                                            | 1.94963300                  | 0.22616900                                   | -0.17247800                 |
| C                                            | 2.02570000                  | 1.59953400                                   | -0.08817500                 |
| C                                            | 0.84582200                  | 2.35474200                                   | 0.09866900                  |
| C                                            | -0.38960800                 | 1.73813300                                   | 0.21727800                  |
| C                                            | -0.46678500                 | 0.33714900                                   | 0.15008700                  |
| C                                            | 0.71997700                  | -0.41495100                                  | -0.04129200                 |
| H                                            | 2.93559300                  | -0.43232800                                  | -0.36674200                 |
| H                                            | 2.98211800                  | 2.10066800                                   | -0.17487800                 |
| H                                            | 0.91749600                  | 3.43450900                                   | 0.14858900                  |
| H                                            | -1.28825300                 | 2.32701900                                   | 0.35803500                  |
| C                                            | -0.98169800                 | -1.85590400                                  | 0.10431000                  |
| H                                            | -1.45307600                 | -2.82687400                                  | 0.11904200                  |
| N                                            | 0.37657400                  | -1.74211800                                  | -0.06250700                 |
| H                                            | 1.01495500                  | -2.51145600                                  | -0.18525400                 |
| C                                            | -1.54618300                 | -0.61361700                                  | 0.24376800                  |
| H                                            | -3.30581700                 | -0.01515700                                  | -1.47936400                 |
| C                                            | -2.99725000                 | -0.31074700                                  | 0.42983400                  |
| H                                            | -3.54863500                 | -1.24521200                                  | 0.57401600                  |
| H                                            | -3.15637300                 | 0.31462100                                   | 1.30937100                  |
| O                                            | -3.55053000                 | 0.43292000                                   | -0.66187500                 |
| O                                            | 3.95339500                  | -1.21798400                                  | -0.12985400                 |
| H                                            | 4.08540700                  | -1.03350000                                  | 0.81656500                  |
| Frequency and Energy                         |                             |                                              |                             |
| Zero-point correction=                       | 0.170542 (Hartree/Particle) | Zero-point correction=                       | 0.170963 (Hartree/Particle) |
| Thermal correction to Energy=                | 0.181856                    | Thermal correction to Energy=                | 0.182241                    |
| Thermal correction to Enthalpy=              | 0.182800                    | Thermal correction to Enthalpy=              | 0.183185                    |
| Thermal correction to Gibbs Free Energy=     | 0.132110                    | Thermal correction to Gibbs Free Energy=     | 0.132869                    |
| Sum of electronic and zero-point Energies=   | -553.897211                 | Sum of electronic and zero-point Energies=   | -553.891415                 |
| Sum of electronic and thermal Energies=      | -553.885897                 | Sum of electronic and thermal Energies=      | -553.880137                 |
| Sum of electronic and thermal Enthalpies=    | -553.884953                 | Sum of electronic and thermal Enthalpies=    | -553.879193                 |

|                                                          |             |             |             |                                                          |             |             |             |
|----------------------------------------------------------|-------------|-------------|-------------|----------------------------------------------------------|-------------|-------------|-------------|
| Sum of electronic and thermal Free Energies= -553.935643 |             |             |             | Sum of electronic and thermal Free Energies= -553.929509 |             |             |             |
| <b>Name: TS-C10-H-OH-HAT</b>                             |             |             |             |                                                          |             |             |             |
| Cartesian Coordinates                                    |             |             |             |                                                          |             |             |             |
| C                                                        | -2.72348600 | 0.29041600  | 0.14393100  | C                                                        | -2.79057700 | 0.16805000  | 0.16791200  |
| C                                                        | -2.88235800 | -1.06743700 | -0.08883000 | C                                                        | -2.87874200 | -1.20914000 | 0.03855300  |
| C                                                        | -1.77263200 | -1.90656500 | -0.32403200 | C                                                        | -1.72789700 | -2.00499800 | -0.13612200 |
| C                                                        | -0.48153000 | -1.40079200 | -0.33414200 | C                                                        | -0.46436000 | -1.43819300 | -0.18924500 |
| C                                                        | -0.28976100 | -0.02691300 | -0.10128100 | C                                                        | -0.34560900 | -0.04377100 | -0.06571500 |
| C                                                        | -1.41866800 | 0.79384600  | 0.13566500  | C                                                        | -1.51285100 | 0.73405900  | 0.11632800  |
| H                                                        | -3.57207600 | 0.93820800  | 0.32714600  | H                                                        | -3.67342900 | 0.78060100  | 0.30626900  |
| H                                                        | -3.87853100 | -1.49276500 | -0.08973000 | H                                                        | -3.85148300 | -1.68455700 | 0.07461300  |
| H                                                        | -1.93630900 | -2.96246600 | -0.50161900 | H                                                        | -1.83755300 | -3.07886600 | -0.22848100 |
| H                                                        | 0.36526200  | -2.05247900 | -0.52232800 | H                                                        | 0.41565600  | -2.05543200 | -0.32314200 |
| C                                                        | 0.40058700  | 2.09252300  | 0.24726400  | C                                                        | 0.23872400  | 2.13125100  | 0.11082900  |
| H                                                        | 0.95149100  | 3.01037600  | 0.38357100  | H                                                        | 0.74372200  | 3.08339300  | 0.16810600  |
| N                                                        | -0.96395800 | 2.07597500  | 0.34410000  | N                                                        | -1.12041700 | 2.05020900  | 0.22278500  |
| H                                                        | -1.54278500 | 2.87781900  | 0.54004100  | H                                                        | -1.73731600 | 2.83548100  | 0.35451400  |
| C                                                        | 0.86865100  | 0.83010200  | -0.02919300 | C                                                        | 0.76873700  | 0.87400400  | -0.07020800 |
| H                                                        | 2.04326900  | -0.73362700 | -1.72821400 | H                                                        | 1.89559400  | -0.16048800 | -2.00379600 |
| C                                                        | 2.29474600  | 0.45066300  | -0.18391800 | C                                                        | 2.20203600  | 0.54860100  | -0.20590200 |
| H                                                        | 2.95314300  | 1.28928800  | 0.03705000  | H                                                        | 2.82269600  | 1.44722900  | -0.25649100 |
| H                                                        | 2.55120400  | -0.35525800 | 0.57883600  | H                                                        | 2.56662400  | -0.01754800 | 0.72923900  |
| O                                                        | 2.65715200  | -0.03507100 | -1.46870600 | O                                                        | 2.49623700  | -0.34516700 | -1.27178400 |
| O                                                        | 2.72553500  | -1.65299100 | 1.50701300  | O                                                        | 3.28030400  | -1.20576100 | 1.33976500  |
| H                                                        | 1.77825500  | -1.88148600 | 1.46731800  | H                                                        | 3.34932000  | -1.65303100 | 0.47725200  |
| Frequency and Energy                                     |             |             |             |                                                          |             |             |             |
| Zero-point correction= 0.173215 (Hartree/Particle)       |             |             |             | Zero-point correction= 0.172481 (Hartree/Particle)       |             |             |             |
| Thermal correction to Energy= 0.184042                   |             |             |             | Thermal correction to Energy= 0.183438                   |             |             |             |
| Thermal correction to Enthalpy= 0.184986                 |             |             |             | Thermal correction to Enthalpy= 0.184382                 |             |             |             |
| Thermal correction to Gibbs Free Energy= 0.135677        |             |             |             | Thermal correction to Gibbs Free Energy= 0.134460        |             |             |             |
| Sum of electronic and zero-point Energies= -553.905968   |             |             |             | Sum of electronic and zero-point Energies= -553.899958   |             |             |             |
| Sum of electronic and thermal Energies= -553.895142      |             |             |             | Sum of electronic and thermal Energies= -553.889001      |             |             |             |
| Sum of electronic and thermal Enthalpies= -553.894198    |             |             |             | Sum of electronic and thermal Enthalpies= -553.888057    |             |             |             |
| Sum of electronic and thermal Free Energies= -553.943506 |             |             |             | Sum of electronic and thermal Free Energies= -553.937979 |             |             |             |
| <b>Name: TS-C2-OH-RAF</b>                                |             |             |             |                                                          |             |             |             |
| Cartesian Coordinates                                    |             |             |             |                                                          |             |             |             |
| C                                                        | 2.39773500  | -0.80872300 | -0.38162200 | C                                                        | 2.39501700  | -0.85187200 | -0.34397300 |
| C                                                        | 3.03329500  | 0.35115600  | 0.05080100  | C                                                        | 3.05030900  | 0.28994900  | 0.09688900  |
| C                                                        | 2.30511200  | 1.48329300  | 0.46476100  | C                                                        | 2.34132100  | 1.44350600  | 0.49031500  |

|                                                          |             |             |             |                                                          |             |             |             |
|----------------------------------------------------------|-------------|-------------|-------------|----------------------------------------------------------|-------------|-------------|-------------|
| C                                                        | 0.91739100  | 1.48221200  | 0.45855100  | C                                                        | 0.95667400  | 1.47882500  | 0.45216500  |
| C                                                        | 0.25441100  | 0.32318800  | 0.02775300  | C                                                        | 0.26772000  | 0.33572300  | 0.01295700  |
| C                                                        | 1.00663900  | -0.79882500 | -0.38700500 | C                                                        | 1.00041000  | -0.81008900 | -0.38155100 |
| H                                                        | 2.95806900  | -1.67904000 | -0.69892500 | H                                                        | 2.94247600  | -1.73647400 | -0.64552600 |
| H                                                        | 4.11569600  | 0.38357500  | 0.06917700  | H                                                        | 4.13286900  | 0.29515300  | 0.13855100  |
| H                                                        | 2.84043600  | 2.36539200  | 0.79301400  | H                                                        | 2.89204800  | 2.31401100  | 0.82503600  |
| H                                                        | 0.35601500  | 2.35222500  | 0.77750200  | H                                                        | 0.41310600  | 2.36798300  | 0.74805000  |
| C                                                        | -1.15106300 | -1.35845700 | -0.56764200 | C                                                        | -1.17542500 | -1.30312600 | -0.59002800 |
| H                                                        | -2.00333400 | -1.95664100 | -0.84524500 | H                                                        | -2.03308800 | -1.87609200 | -0.90107000 |
| N                                                        | 0.10937700  | -1.79149100 | -0.76588500 | N                                                        | 0.09071500  | -1.77354000 | -0.77160500 |
| H                                                        | 0.36119800  | -2.72080300 | -1.06817600 | H                                                        | 0.31899200  | -2.71804700 | -1.03723700 |
| C                                                        | -1.13143200 | -0.03485100 | -0.08850800 | C                                                        | -1.12410900 | 0.01626800  | -0.13723100 |
| H                                                        | -2.55887500 | 1.49918400  | -1.70400900 | H                                                        | -2.30286400 | 1.75897400  | -1.62733800 |
| C                                                        | -2.31821500 | 0.84283300  | 0.13199400  | C                                                        | -2.29636200 | 0.90064400  | 0.13425000  |
| H                                                        | -3.22927300 | 0.24377000  | 0.11205700  | H                                                        | -3.21960200 | 0.32560700  | 0.02936100  |
| H                                                        | -2.24194900 | 1.33746600  | 1.09925200  | H                                                        | -2.25330600 | 1.28733500  | 1.15294500  |
| O                                                        | -2.38574200 | 1.89558800  | -0.84107000 | O                                                        | -2.31119000 | 2.05619400  | -0.71056100 |
| O                                                        | -1.67512200 | -1.49366100 | 1.66678000  | O                                                        | -1.81180900 | -1.71486500 | 1.50672500  |
| H                                                        | -0.75994500 | -1.39107200 | 1.96637500  | H                                                        | -1.03497200 | -1.33326700 | 1.94639600  |
| Frequency and Energy                                     |             |             |             |                                                          |             |             |             |
| Zero-point correction= 0.177135 (Hartree/Particle)       |             |             |             | Zero-point correction= 0.176765 (Hartree/Particle)       |             |             |             |
| Thermal correction to Energy= 0.187907                   |             |             |             | Thermal correction to Energy= 0.187673                   |             |             |             |
| Thermal correction to Enthalpy= 0.188851                 |             |             |             | Thermal correction to Enthalpy= 0.188618                 |             |             |             |
| Thermal correction to Gibbs Free Energy= 0.140064        |             |             |             | Thermal correction to Gibbs Free Energy= 0.139412        |             |             |             |
| Sum of electronic and zero-point Energies= -553.915957   |             |             |             | Sum of electronic and zero-point Energies= -553.905809   |             |             |             |
| Sum of electronic and thermal Energies= -553.905185      |             |             |             | Sum of electronic and thermal Energies= -553.894901      |             |             |             |
| Sum of electronic and thermal Enthalpies= -553.904241    |             |             |             | Sum of electronic and thermal Enthalpies= -553.893957    |             |             |             |
| Sum of electronic and thermal Free Energies= -553.953029 |             |             |             | Sum of electronic and thermal Free Energies= -553.943162 |             |             |             |
| <b>Name: TS-C3-OH-RAF</b>                                |             |             |             |                                                          |             |             |             |
| Cartesian Coordinates                                    |             |             |             |                                                          |             |             |             |
| C                                                        | -2.39759600 | 0.80864800  | -0.38186700 | C                                                        | 2.42285300  | -0.78923100 | -0.36407400 |
| C                                                        | -3.03325800 | -0.35112600 | 0.05068700  | C                                                        | 3.02398800  | 0.40998200  | -0.00302500 |
| C                                                        | -2.30517900 | -1.48322600 | 0.46493900  | C                                                        | 2.25923700  | 1.53367100  | 0.36340500  |
| C                                                        | -0.91746400 | -1.48221400 | 0.45888600  | C                                                        | 0.87206800  | 1.48068200  | 0.38360500  |
| C                                                        | -0.25436500 | -0.32330200 | 0.02793800  | C                                                        | 0.24309500  | 0.28107000  | 0.02872900  |
| C                                                        | -1.00649900 | 0.79867900  | -0.38711100 | C                                                        | 1.02905800  | -0.82926800 | -0.34625200 |
| H                                                        | -2.95785300 | 1.67893400  | -0.69939000 | H                                                        | 3.01086500  | -1.65302900 | -0.64929100 |
| H                                                        | -4.11566300 | -0.38349300 | 0.06893400  | H                                                        | 4.10485900  | 0.48232200  | -0.00626300 |
| H                                                        | -2.84058400 | -2.36524200 | 0.79328400  | H                                                        | 2.76521400  | 2.45253900  | 0.63292800  |
| H                                                        | -0.35617100 | -2.35220100 | 0.77804800  | H                                                        | 0.28704000  | 2.34810900  | 0.66501700  |



|                                                          |             |             |             |                                                          |             |             |             |
|----------------------------------------------------------|-------------|-------------|-------------|----------------------------------------------------------|-------------|-------------|-------------|
| C                                                        | 1.15126300  | 1.35818500  | -0.56756900 | C                                                        | -1.11850400 | -1.45276000 | -0.49766900 |
| H                                                        | 2.00355500  | 1.95613700  | -0.84559900 | H                                                        | -1.94839100 | -2.11684100 | -0.68127900 |
| N                                                        | -0.10915400 | 1.79122100  | -0.76609500 | N                                                        | 0.16173000  | -1.86397500 | -0.66410900 |
| H                                                        | -0.36089100 | 2.72044300  | -1.06872800 | H                                                        | 0.43864200  | -2.79689400 | -0.92662200 |
| C                                                        | 1.13147600  | 0.03456000  | -0.08838800 | C                                                        | -1.14347400 | -0.13697300 | -0.02981900 |
| H                                                        | 2.55859400  | -1.49999600 | -1.70361000 | H                                                        | -2.54894200 | 1.04840200  | -1.88043600 |
| C                                                        | 2.31826400  | -0.84309000 | 0.13225600  | C                                                        | -2.34333000 | 0.75317200  | 0.04715000  |
| H                                                        | 3.22932100  | -0.24401300 | 0.11203000  | H                                                        | -3.24051300 | 0.14387700  | 0.17807700  |
| H                                                        | 2.24212200  | -1.33743400 | 1.09966900  | H                                                        | -2.25576400 | 1.41722800  | 0.90414100  |
| O                                                        | 2.38568000  | -1.89612000 | -0.84050000 | O                                                        | -2.46607700 | 1.60384000  | -1.09759800 |
| O                                                        | 1.67476600  | 1.49456100  | 1.66621600  | O                                                        | -1.60278200 | -0.94820500 | 1.94103300  |
| H                                                        | 0.75821900  | 1.39810100  | 1.96366500  | H                                                        | -0.66420300 | -1.02503500 | 2.17270700  |
| Frequency and Energy                                     |             |             |             |                                                          |             |             |             |
| Zero-point correction= 0.177174 (Hartree/Particle)       |             |             |             | Zero-point correction= 0.177168 (Hartree/Particle)       |             |             |             |
| Thermal correction to Energy= 0.187914                   |             |             |             | Thermal correction to Energy= 0.187859                   |             |             |             |
| Thermal correction to Enthalpy= 0.188858                 |             |             |             | Thermal correction to Enthalpy= 0.188804                 |             |             |             |
| Thermal correction to Gibbs Free Energy= 0.140171        |             |             |             | Thermal correction to Gibbs Free Energy= 0.140459        |             |             |             |
| Sum of electronic and zero-point Energies= -553.915919   |             |             |             | Sum of electronic and zero-point Energies= -553.905388   |             |             |             |
| Sum of electronic and thermal Energies= -553.905179      |             |             |             | Sum of electronic and thermal Energies= -553.894697      |             |             |             |
| Sum of electronic and thermal Enthalpies= -553.904234    |             |             |             | Sum of electronic and thermal Enthalpies= -553.893753    |             |             |             |
| Sum of electronic and thermal Free Energies= -553.952921 |             |             |             | Sum of electronic and thermal Free Energies= -553.942097 |             |             |             |
| <b>Name: TS-C5-OH-RAF</b>                                |             |             |             |                                                          |             |             |             |
| Cartesian Coordinates                                    |             |             |             |                                                          |             |             |             |
| C                                                        | 2.38487800  | 0.71621600  | 0.30044400  | C                                                        | 2.33117200  | 0.86505300  | 0.24775300  |
| C                                                        | 2.76711700  | -0.61251500 | -0.02507900 | C                                                        | 2.79401400  | -0.40669800 | -0.08663900 |
| C                                                        | 1.86643300  | -1.53488800 | -0.52420500 | C                                                        | 1.92765300  | -1.39533500 | -0.57231700 |
| C                                                        | 0.50791900  | -1.19095500 | -0.72209700 | C                                                        | 0.55349200  | -1.15184500 | -0.71547800 |
| C                                                        | 0.11308700  | 0.13290500  | -0.40451500 | C                                                        | 0.06750800  | 0.13371500  | -0.38118100 |
| C                                                        | 1.06601000  | 1.05315600  | 0.10219800  | C                                                        | 0.96482700  | 1.11497700  | 0.09912600  |
| H                                                        | 3.10458000  | 1.42058400  | 0.69689500  | H                                                        | 3.00718800  | 1.62684200  | 0.61686400  |
| H                                                        | 3.80172700  | -0.89879800 | 0.11309700  | H                                                        | 3.84765800  | -0.63132600 | 0.02282000  |
| H                                                        | 2.20145900  | -2.53122400 | -0.77991700 | H                                                        | 2.32156600  | -2.36828300 | -0.83756600 |
| H                                                        | -0.15262000 | -1.84546800 | -1.26895600 | H                                                        | -0.07905600 | -1.87014400 | -1.21991000 |
| C                                                        | -0.91941500 | 2.06815900  | 0.07540300  | C                                                        | -1.09558200 | 1.98868700  | 0.11022200  |
| H                                                        | -1.62894100 | 2.86747800  | 0.22538200  | H                                                        | -1.84537900 | 2.74587800  | 0.28232700  |
| N                                                        | 0.38255700  | 2.23391700  | 0.35979900  | N                                                        | 0.22437000  | 2.24105600  | 0.37334800  |
| H                                                        | 0.79763600  | 3.08534700  | 0.71403100  | H                                                        | 0.59056300  | 3.11085300  | 0.72581000  |
| C                                                        | -1.14244200 | 0.76638000  | -0.40421300 | C                                                        | -1.24428400 | 0.70309300  | -0.35812200 |
| H                                                        | -1.92348100 | -1.36844200 | 0.64854900  | H                                                        | -2.00226000 | -1.44605300 | 0.63651100  |
| C                                                        | -2.44973900 | 0.08731800  | -0.66538000 | C                                                        | -2.50835200 | -0.04314900 | -0.64260200 |

|                                                          |             |             |             |                                                          |             |             |             |
|----------------------------------------------------------|-------------|-------------|-------------|----------------------------------------------------------|-------------|-------------|-------------|
| H                                                        | -3.24785500 | 0.82542600  | -0.74560900 | H                                                        | -3.35031900 | 0.64630300  | -0.70670300 |
| H                                                        | -2.39222300 | -0.46255400 | -1.61037100 | H                                                        | -2.42656400 | -0.56638000 | -1.60192600 |
| O                                                        | -2.76496100 | -0.79903300 | 0.40793100  | O                                                        | -2.81856000 | -0.97739800 | 0.39356700  |
| O                                                        | -0.75300800 | -2.19318100 | 1.01765600  | O                                                        | -0.26335300 | -2.27476900 | 1.05411200  |
| H                                                        | -0.25750700 | -1.70671800 | 1.68827200  | H                                                        | 0.27862900  | -1.76872800 | 1.68232300  |
| Frequency and Energy                                     |             |             |             |                                                          |             |             |             |
| Zero-point correction= 0.175689 (Hartree/Particle)       |             |             |             | Zero-point correction= 0.177361 (Hartree/Particle)       |             |             |             |
| Thermal correction to Energy= 0.185770                   |             |             |             | Thermal correction to Energy= 0.187831                   |             |             |             |
| Thermal correction to Enthalpy= 0.186714                 |             |             |             | Thermal correction to Enthalpy= 0.188775                 |             |             |             |
| Thermal correction to Gibbs Free Energy= 0.139564        |             |             |             | Thermal correction to Gibbs Free Energy= 0.140775        |             |             |             |
| Sum of electronic and zero-point Energies= -553.912020   |             |             |             | Sum of electronic and zero-point Energies= -553.905428   |             |             |             |
| Sum of electronic and thermal Energies= -553.901939      |             |             |             | Sum of electronic and thermal Energies= -553.894958      |             |             |             |
| Sum of electronic and thermal Enthalpies= -553.900995    |             |             |             | Sum of electronic and thermal Enthalpies= -553.894013    |             |             |             |
| Sum of electronic and thermal Free Energies= -553.948145 |             |             |             | Sum of electronic and thermal Free Energies= -553.942014 |             |             |             |
| <b>Name: TS-C6-OH-RAF</b>                                |             |             |             |                                                          |             |             |             |
| Cartesian Coordinates                                    |             |             |             |                                                          |             |             |             |
| C                                                        | 1.88416600  | 1.42741200  | 0.04283100  | C                                                        | 1.83492900  | 1.47205600  | 0.01811200  |
| C                                                        | 2.63107500  | 0.34984500  | -0.37633800 | C                                                        | 2.59975300  | 0.39767700  | -0.36717700 |
| C                                                        | 2.01394000  | -0.87940300 | -0.74880100 | C                                                        | 2.00991700  | -0.86848700 | -0.68011600 |
| C                                                        | 0.61485000  | -1.00120200 | -0.77194600 | C                                                        | 0.60762800  | -1.00583600 | -0.71073900 |
| C                                                        | -0.16087400 | 0.07899600  | -0.34416300 | C                                                        | -0.18534700 | 0.07204500  | -0.30931800 |
| C                                                        | 0.48466700  | 1.27508600  | 0.06047200  | C                                                        | 0.43709000  | 1.29403100  | 0.05029300  |
| H                                                        | 2.34650900  | 2.35946900  | 0.34301300  | H                                                        | 2.28424300  | 2.42209700  | 0.28038100  |
| H                                                        | 3.71104600  | 0.42071100  | -0.40535700 | H                                                        | 3.67802600  | 0.48670700  | -0.40216600 |
| H                                                        | 2.62228900  | -1.66549400 | -1.17371300 | H                                                        | 2.62180700  | -1.62158200 | -1.15439000 |
| H                                                        | 0.15488100  | -1.92808500 | -1.09219800 | H                                                        | 0.16315800  | -1.95088000 | -0.99561500 |
| C                                                        | -1.72432100 | 1.58005600  | 0.26058800  | C                                                        | -1.77891300 | 1.56131100  | 0.25025100  |
| H                                                        | -2.62298400 | 2.12993200  | 0.49389500  | H                                                        | -2.68898300 | 2.10039400  | 0.46503600  |
| N                                                        | -0.48652600 | 2.16327200  | 0.42059900  | N                                                        | -0.55223600 | 2.17387900  | 0.38601900  |
| H                                                        | -0.32434100 | 3.10470100  | 0.74391800  | H                                                        | -0.41071400 | 3.12624200  | 0.68245800  |
| C                                                        | -1.58036000 | 0.30166800  | -0.20922300 | C                                                        | -1.61006100 | 0.27182400  | -0.17863000 |
| H                                                        | -2.75143200 | -1.44811600 | 1.29827600  | H                                                        | -2.57564400 | -1.57420800 | 1.30406900  |
| C                                                        | -2.67504300 | -0.66944900 | -0.50064600 | C                                                        | -2.68894700 | -0.72412300 | -0.45522400 |
| H                                                        | -3.64037400 | -0.16112900 | -0.45289600 | H                                                        | -3.66532600 | -0.24025000 | -0.35451200 |
| H                                                        | -2.55879000 | -1.10124000 | -1.49449600 | H                                                        | -2.60829500 | -1.11108000 | -1.47189000 |
| O                                                        | -2.66458200 | -1.79185000 | 0.40054500  | O                                                        | -2.60941600 | -1.87654900 | 0.38960100  |
| O                                                        | 2.15511400  | -1.99690600 | 1.18568500  | O                                                        | 2.35780900  | -1.90688400 | 1.06465500  |
| H                                                        | 1.61602500  | -1.32166700 | 1.62889000  | H                                                        | 1.72394700  | -1.41012200 | 1.60573700  |
| Frequency and Energy                                     |             |             |             |                                                          |             |             |             |

|                                              |                                     |                                              |                                     |
|----------------------------------------------|-------------------------------------|----------------------------------------------|-------------------------------------|
| Zero-point correction=                       | 0.176142 (Hartree/Particle)         | Zero-point correction=                       | 0.176974 (Hartree/Particle)         |
| Thermal correction to Energy=                | 0.187248                            | Thermal correction to Energy=                | 0.187798                            |
| Thermal correction to Enthalpy=              | 0.188192                            | Thermal correction to Enthalpy=              | 0.188742                            |
| Thermal correction to Gibbs Free Energy=     | 0.138242                            | Thermal correction to Gibbs Free Energy=     | 0.139554                            |
| Sum of electronic and zero-point Energies=   | -553.908846                         | Sum of electronic and zero-point Energies=   | -553.898334                         |
| Sum of electronic and thermal Energies=      | -553.897741                         | Sum of electronic and thermal Energies=      | -553.887510                         |
| Sum of electronic and thermal Enthalpies=    | -553.896797                         | Sum of electronic and thermal Enthalpies=    | -553.886566                         |
| Sum of electronic and thermal Free Energies= | -553.946746                         | Sum of electronic and thermal Free Energies= | -553.935753                         |
| <b>Name: TS-C7-OH-RAF</b>                    |                                     |                                              |                                     |
| Cartesian Coordinates                        |                                     |                                              |                                     |
| C                                            | 1.90742100 1.00674100 -0.30834000   | C                                            | 1.88686800 1.02325700 -0.29133000   |
| C                                            | 2.50137000 -0.23689100 -0.57356900  | C                                            | 2.48801800 -0.22807300 -0.52615300  |
| C                                            | 1.70245300 -1.39693600 -0.79203800  | C                                            | 1.67724700 -1.38565100 -0.75489700  |
| C                                            | 0.33131300 -1.34899800 -0.68067100  | C                                            | 0.30837300 -1.33427300 -0.64446600  |
| C                                            | -0.28378000 -0.11376400 -0.37147100 | C                                            | -0.30623500 -0.09549900 -0.34199700 |
| C                                            | 0.52251900 1.03924500 -0.19042800   | C                                            | 0.50283400 1.05651300 -0.16938600   |
| H                                            | 2.51050900 1.89629600 -0.17813500   | H                                            | 2.49326400 1.91127600 -0.16782400   |
| H                                            | 3.56231800 -0.28096400 -0.77648100  | H                                            | 3.53344300 -0.26287500 -0.79539900  |
| H                                            | 2.19705600 -2.33085700 -1.02721500  | H                                            | 2.17157000 -2.32212700 -0.97989800  |
| H                                            | -0.27056200 -2.23774000 -0.82979100 | H                                            | -0.29493400 -2.22302700 -0.78555800 |
| C                                            | -1.60970600 1.64374100 0.08454300   | C                                            | -1.63073000 1.66486600 0.11239000   |
| H                                            | -2.42820600 2.32089000 0.27619400   | H                                            | -2.44846500 2.34291900 0.30550700   |
| N                                            | -0.32138400 2.09225600 0.08817400   | N                                            | -0.34047800 2.11192600 0.10424800   |
| H                                            | -0.03585800 3.04540600 0.25220900   | H                                            | -0.05185100 3.06182500 0.27434700   |
| C                                            | -1.64322600 0.29299000 -0.19370000  | C                                            | -1.66556700 0.31348700 -0.15973400  |
| H                                            | -3.01971500 -0.93704900 1.65191800  | H                                            | -2.75855100 -1.15084500 1.62146200  |
| C                                            | -2.86056300 -0.56752800 -0.26858900 | C                                            | -2.88490100 -0.54753100 -0.23549600 |
| H                                            | -3.75363600 0.05819500 -0.32571800  | H                                            | -3.78015000 0.07739300 -0.15938900  |
| H                                            | -2.82895200 -1.20701900 -1.15023200 | H                                            | -2.92591500 -1.07981800 -1.18657700 |
| O                                            | -2.96634900 -1.46976800 0.84876800  | O                                            | -2.90156600 -1.57088300 0.76574600  |
| O                                            | 3.06459000 -0.56509000 1.58075200   | O                                            | 3.14295400 -0.57585000 1.41484400   |
| H                                            | 2.12399400 -0.60569700 1.81945400   | H                                            | 2.25837900 -0.76691100 1.76529500   |
| Frequency and Energy                         |                                     |                                              |                                     |
| Zero-point correction=                       | 0.175937 (Hartree/Particle)         | Zero-point correction=                       | 0.176467 (Hartree/Particle)         |
| Thermal correction to Energy=                | 0.187066                            | Thermal correction to Energy=                | 0.187451                            |
| Thermal correction to Enthalpy=              | 0.188010                            | Thermal correction to Enthalpy=              | 0.188395                            |
| Thermal correction to Gibbs Free Energy=     | 0.137889                            | Thermal correction to Gibbs Free Energy=     | 0.138858                            |
| Sum of electronic and zero-point Energies=   | -553.908755                         | Sum of electronic and zero-point Energies=   | -553.899022                         |
| Sum of electronic and thermal Energies=      | -553.897626                         | Sum of electronic and thermal Energies=      | -553.888038                         |
| Sum of electronic and thermal Enthalpies=    | -553.896682                         | Sum of electronic and thermal Enthalpies=    | -553.887093                         |

|                                                          |             |             |             |                                                          |             |             |             |
|----------------------------------------------------------|-------------|-------------|-------------|----------------------------------------------------------|-------------|-------------|-------------|
| Sum of electronic and thermal Free Energies= -553.946803 |             |             |             | Sum of electronic and thermal Free Energies= -553.936630 |             |             |             |
| <b>Name: TS-C8-OH-RAF</b>                                |             |             |             |                                                          |             |             |             |
| Cartesian Coordinates                                    |             |             |             |                                                          |             |             |             |
| C                                                        | 2.07674800  | 0.52573000  | -0.43977900 | C                                                        | 2.09129700  | 0.41699200  | -0.41485000 |
| C                                                        | 2.48517700  | -0.81620500 | -0.49145100 | C                                                        | 2.43297000  | -0.94895900 | -0.45246800 |
| C                                                        | 1.55622400  | -1.86643600 | -0.43942300 | C                                                        | 1.45918700  | -1.95140800 | -0.36843300 |
| C                                                        | 0.19026500  | -1.61131000 | -0.36476200 | C                                                        | 0.10422300  | -1.63507600 | -0.29598300 |
| C                                                        | -0.25679500 | -0.27941300 | -0.35007200 | C                                                        | -0.28240100 | -0.28416500 | -0.31155200 |
| C                                                        | 0.69092700  | 0.76700100  | -0.40659100 | C                                                        | 0.71085000  | 0.71542000  | -0.39624800 |
| H                                                        | 2.78458400  | 1.33375400  | -0.56473500 | H                                                        | 2.82486800  | 1.17818100  | -0.63753600 |
| H                                                        | 3.54322700  | -1.03773300 | -0.54882900 | H                                                        | 3.47953200  | -1.21919600 | -0.51251500 |
| H                                                        | 1.91122100  | -2.88896500 | -0.45790800 | H                                                        | 1.76710300  | -2.98967700 | -0.36573400 |
| H                                                        | -0.52019500 | -2.42876000 | -0.32072100 | H                                                        | -0.64084000 | -2.41856200 | -0.22710100 |
| C                                                        | -1.34329200 | 1.69034200  | -0.31812400 | C                                                        | -1.27856500 | 1.73359100  | -0.31880400 |
| H                                                        | -2.05668400 | 2.49990500  | -0.29994400 | H                                                        | -1.95480500 | 2.57493100  | -0.31411300 |
| N                                                        | 0.00472300  | 1.94970900  | -0.38551200 | N                                                        | 0.08035600  | 1.92631200  | -0.40031000 |
| H                                                        | 0.41888500  | 2.86860400  | -0.42188100 | H                                                        | 0.53903500  | 2.82329300  | -0.41604000 |
| C                                                        | -1.55806600 | 0.33527000  | -0.29712500 | C                                                        | -1.55522600 | 0.39105400  | -0.27005300 |
| H                                                        | -3.04557900 | -0.31512700 | 1.74389100  | H                                                        | -2.89852300 | -0.42044000 | 1.75741200  |
| C                                                        | -2.87663200 | -0.35786700 | -0.21092900 | C                                                        | -2.90774300 | -0.23858000 | -0.19031500 |
| H                                                        | -3.68318700 | 0.35361500  | -0.40006200 | H                                                        | -3.67643500 | 0.53531500  | -0.27917900 |
| H                                                        | -2.94162000 | -1.15982600 | -0.94595400 | H                                                        | -3.05288100 | -0.95230800 | -1.00227500 |
| O                                                        | -3.07740100 | -0.99872200 | 1.06327100  | O                                                        | -3.09581200 | -0.99620800 | 1.01002100  |
| O                                                        | 2.54533100  | 0.62225900  | 1.79600700  | O                                                        | 2.62439900  | 0.77391000  | 1.60873300  |
| H                                                        | 2.02551900  | -0.18439100 | 1.95003700  | H                                                        | 2.17420800  | -0.01056000 | 1.96145700  |
| Frequency and Energy                                     |             |             |             |                                                          |             |             |             |
| Zero-point correction= 0.176142 (Hartree/Particle)       |             |             |             | Zero-point correction= 0.176576 (Hartree/Particle)       |             |             |             |
| Thermal correction to Energy= 0.187222                   |             |             |             | Thermal correction to Energy= 0.187625                   |             |             |             |
| Thermal correction to Enthalpy= 0.188167                 |             |             |             | Thermal correction to Enthalpy= 0.188569                 |             |             |             |
| Thermal correction to Gibbs Free Energy= 0.138054        |             |             |             | Thermal correction to Gibbs Free Energy= 0.138557        |             |             |             |
| Sum of electronic and zero-point Energies= -553.909534   |             |             |             | Sum of electronic and zero-point Energies= -553.901123   |             |             |             |
| Sum of electronic and thermal Energies= -553.898453      |             |             |             | Sum of electronic and thermal Energies= -553.890074      |             |             |             |
| Sum of electronic and thermal Enthalpies= -553.897509    |             |             |             | Sum of electronic and thermal Enthalpies= -553.889130    |             |             |             |
| Sum of electronic and thermal Free Energies= -553.947622 |             |             |             | Sum of electronic and thermal Free Energies= -553.939142 |             |             |             |
